# Supplementary material for: A note on precision-preserving compression of scientific data
Source: Copernicus journal article supplement (doi:10.5194/gmd-14-377-2021), 2021-01-22
Supplement: Supplementary file [file gmd-14-377-2021-supplement-title-page.pdf › gmd-14-377-2021-supplement-title-page.pdf]

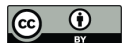

## *Supplement of*

# **A note on precision-preserving compression of scientific data**

**Rostislav Kouznetsov**

*Correspondence to:* Rostislav Kouznetsov ([rostislav.kouznetsov@fmi.fi](mailto:rostislav.kouznetsov@fmi.fi))

- [gmd-14-377-2021-supplement-title-page.pdf](#)
- [strucfunc.py](#)

The copyright of individual parts of the supplement might differ from the CC BY 4.0 License.
